# Supplementary material for: The bottromycin epimerase BotH defines a group of atypical α/β-hydrolase-fold enzymes
Source: Springer Nature journal article supplement (doi:10.1038/s41589-020-0569-y), 2020-06-29
Supplement: 41589_2020_569_MOESM16_ESM.mol [file 41589_2020_569_MOESM16_ESM.mol]

nchembio.A191210477B-comp5.mol
  ChemDraw05112015322D

 59 62  0  0  1  0  0  0  0  0999 V2000
   -3.5107   -1.0316    0.0000 C   0  0  0  0  0  0  0  0  0  0  0  0
   -3.5107   -1.8560    0.0000 C   0  0  0  0  0  0  0  0  0  0  0  0
   -2.7968   -2.2680    0.0000 N   0  0  0  0  0  0  0  0  0  0  0  0
   -2.0812   -1.8560    0.0000 C   0  0  0  0  0  0  0  0  0  0  0  0
   -2.7968   -0.6173    0.0000 N   0  0  0  0  0  0  0  0  0  0  0  0
   -1.3673   -2.2680    0.0000 C   0  0  0  0  0  0  0  0  0  0  0  0
   -0.6523   -1.8560    0.0000 N   0  0  0  0  0  0  0  0  0  0  0  0
   -0.6523   -1.0316    0.0000 C   0  0  0  0  0  0  0  0  0  0  0  0
   -1.3673   -0.6173    0.0000 C   0  0  0  0  0  0  0  0  0  0  0  0
   -1.3673    0.2077    0.0000 N   0  0  0  0  0  0  0  0  0  0  0  0
   -2.0812    0.6196    0.0000 C   0  0  0  0  0  0  0  0  0  0  0  0
   -2.7957    0.2077    0.0000 C   0  0  0  0  0  0  0  0  0  0  0  0
   -4.2257   -0.6196    0.0000 O   0  0  0  0  0  0  0  0  0  0  0  0
    0.0628   -0.6196    0.0000 O   0  0  0  0  0  0  0  0  0  0  0  0
   -2.0812    1.4447    0.0000 N   0  0  0  0  0  0  0  0  0  0  0  0
   -3.5095    0.6208    0.0000 C   0  0  0  0  0  0  0  0  0  0  0  0
   -4.2251   -2.2691    0.0000 C   0  0  0  0  0  0  0  0  0  0  0  0
   -2.0812   -1.0316    0.0000 O   0  0  0  0  0  0  0  0  0  0  0  0
   -1.3673    1.8572    0.0000 C   0  0  0  0  0  0  0  0  0  0  0  0
   -1.1966   -3.0758    0.0000 C   0  0  0  0  0  0  0  0  0  0  0  0
   -0.3761   -3.1629    0.0000 C   0  0  0  0  0  0  0  0  0  0  0  0
   -0.0392   -2.4095    0.0000 C   0  0  0  0  0  0  0  0  0  0  0  0
   -4.2251   -3.0942    0.0000 C   0  0  0  0  0  0  0  0  0  0  0  0
   -4.2246    0.2088    0.0000 C   0  0  0  0  0  0  0  0  0  0  0  0
   -3.5090    1.4458    0.0000 C   0  0  0  0  0  0  0  0  0  0  0  0
   -1.3673    2.6822    0.0000 C   0  0  0  0  0  0  0  0  0  0  0  0
   -0.6528    1.4447    0.0000 C   0  0  0  0  0  0  0  0  0  0  0  0
    0.0616    1.8572    0.0000 N   0  0  0  0  0  0  0  0  0  0  0  0
   -0.6528    0.6196    0.0000 O   0  0  0  0  0  0  0  0  0  0  0  0
    0.7761    1.4447    0.0000 C   0  0  0  0  0  0  0  0  0  0  0  0
    1.4905    1.8572    0.0000 C   0  0  0  0  0  0  0  0  0  0  0  0
    2.2050    1.4447    0.0000 N   0  0  0  0  0  0  0  0  0  0  0  0
    2.9194    1.8572    0.0000 C   0  0  0  0  0  0  0  0  0  0  0  0
    3.6339    1.4447    0.0000 C   0  0  0  0  0  0  0  0  0  0  0  0
    3.7198    0.6242    0.0000 N   0  0  0  0  0  0  0  0  0  0  0  0
    4.5271    0.4529    0.0000 C   0  0  0  0  0  0  0  0  0  0  0  0
    4.9396    1.1674    0.0000 C   0  0  0  0  0  0  0  0  0  0  0  0
    4.3873    1.7798    0.0000 S   0  0  0  0  0  0  0  0  0  0  0  0
    1.4905    2.6822    0.0000 O   0  0  0  0  0  0  0  0  0  0  0  0
    2.9194    2.6822    0.0000 C   0  0  0  0  0  0  0  0  0  0  0  0
   -0.6528    3.0947    0.0000 C   0  0  0  0  0  0  0  0  0  0  0  0
   -2.0812    3.0947    0.0000 C   0  0  0  0  0  0  0  0  0  0  0  0
    3.6339    3.0947    0.0000 C   0  0  0  0  0  0  0  0  0  0  0  0
    3.6339    3.9192    0.0000 O   0  0  0  0  0  0  0  0  0  0  0  0
    4.3484    2.6822    0.0000 O   0  0  0  0  0  0  0  0  0  0  0  0
    0.7761    0.6196    0.0000 C   0  0  0  0  0  0  0  0  0  0  0  0
    1.4905    0.2071    0.0000 C   0  0  0  0  0  0  0  0  0  0  0  0
    1.4905   -0.6179    0.0000 C   0  0  0  0  0  0  0  0  0  0  0  0
    2.2050   -1.0304    0.0000 C   0  0  0  0  0  0  0  0  0  0  0  0
    2.9194   -0.6179    0.0000 C   0  0  0  0  0  0  0  0  0  0  0  0
    2.9194    0.2071    0.0000 C   0  0  0  0  0  0  0  0  0  0  0  0
    2.2050    0.6196    0.0000 C   0  0  0  0  0  0  0  0  0  0  0  0
   -1.3673    3.5073    0.0000 C   0  0  0  0  0  0  0  0  0  0  0  0
   -4.2234    1.0339    0.0000 C   0  0  0  0  0  0  0  0  0  0  0  0
    0.0616    0.2071    0.0000 C   0  0  0  0  0  0  0  0  0  0  0  0
   -1.7495   -3.6883    0.0000 C   0  0  0  0  0  0  0  0  0  0  0  0
    2.9194    4.3317    0.0000 C   0  0  0  0  0  0  0  0  0  0  0  0
   -4.9396   -3.5067    0.0000 S   0  0  0  0  0  0  0  0  0  0  0  0
   -4.9396   -4.3317    0.0000 C   0  0  0  0  0  0  0  0  0  0  0  0
  1  2  1  0      
  2  3  1  0      
  3  4  1  0      
  1  5  1  0      
  6  4  1  1      
  6  7  1  0      
  7  8  1  0      
  8  9  1  0      
  9 10  1  0      
 10 11  1  0      
 11 12  1  0      
  5 12  1  0      
  1 13  2  0      
  8 14  2  0      
 11 15  2  0      
 12 16  1  1      
  2 17  1  1      
  4 18  2  0      
 15 19  1  0      
  6 20  1  0      
 20 21  1  0      
 21 22  1  0      
 22  7  1  0      
 17 23  1  0      
 16 24  1  0      
 16 25  1  0      
 19 26  1  1      
 19 27  1  0      
 27 28  1  0      
 27 29  2  0      
 30 28  1  6      
 30 31  1  0      
 31 32  1  0      
 32 33  1  0      
 33 34  1  0      
 34 35  2  0      
 35 36  1  0      
 36 37  2  0      
 37 38  1  0      
 38 34  1  0      
 31 39  2  0      
 33 40  1  6      
 26 41  1  0      
 26 42  1  0      
 40 43  1  0      
 43 44  1  0      
 43 45  2  0      
 30 46  1  0      
 46 47  1  0      
 47 48  2  0      
 48 49  1  0      
 49 50  2  0      
 50 51  1  0      
 51 52  2  0      
 52 47  1  0      
 26 53  1  0      
 16 54  1  0      
 46 55  1  6      
 20 56  1  1      
 44 57  1  0      
 23 58  1  0      
 58 59  1  0      
M  END
